# Supplementary material for: The Relation Between C3 Hypocomplementemia, Thrombotic Microangiopathy And End-Stage Kidney Disease In Iga Nephropathy
Source: Preprints.org preprint supplement (doi:10.20944/preprints202402.0522.v1), 2024-02-08
Supplement: Supplementary file 1 [file supplementary]

**Table S1.** Crude and multivariable adjusted HR associated with C3 to C4 ratio from Cox PH regression models**.**

| tabe | C3/C4-Crude | C3/C4-Adj. | C3/C4-Adj.+RAASi | C3/C4+TMA | C3/C4+TMA-Adj. | C3/C4+TMA Adj.+RAASi |
| --- | --- | --- | --- | --- | --- | --- |
| Point estimate | 0.89*** | 0.91* | 0.92 | 0.90** | 0.92 | 0.92 |
| [Lower bound of CI,Upper bound of CI] | [0.82,0.97] | [0.82,1.00] | [0.83,1.02] | [0.82,0.98] | [0.83,1.02] | [0.83,1.03] |
| p-value | 0.009 | 0.051 | 0.103 | 0.018 | 0.108 | 0.153 |
| Comparison of crude and multivariable adjusted hazard ratios of ESKD associated with C3/C4 ratio from Cox proportional hazard regression models The table reports the hazard ratio of ESKD [95 percent confidence interval] and P value for each model; asterisks refer to the level of P value to ease the readability of the table as follows: <0.01 ***, <0.05 **, 0.1 *. ESKD, end stage kidney disease; RAASi, renin angiotensin aldosterone inhibitors ; TMA, thrombotic microangiopathy. LowC3-Crude, model including Low C3 only; TMA-Crude, model including TMA only; LowC3-Adj, model for Low C3 adjusted for age, ethnicity and gender; TMA-Adj, model for TMA adjusted for age, ethnicity and gender; LowC3-Adj.+RAASi, model including Low C3 additionally adjusted for RAASi; TMA-Adj.+RAASi, model including TMA additionally adjusted for RAASi; LowC3+TMA, model including both Low C3 and TMA; LowC3+TMA-Adj., model including both Low C3 and TMA adjusted for age, ethnicity and gender; LowC3+TMA Adj.+RAASi, model including both Low C3 and TMA, additionally adjusted for RASSi. | | | | | | |

**Table S2.** Statistical tests that C3/C4 ratio is better than C3 alone to predict end stage kidney disease**.**

| C3/C4-Crude: Test that C3/C4 better than C3: P=0.079 |
| --- |
| C3/C4-Adj: Test that C3/C4 better than C3: P=0.215 |
| C3/C4-Adj.+RAASi: Test that C3/C4 better than C3: P=0.279 |
| C3/C4+TMA: Test that C3/C4 better than C3: P=0.096 |
| C3/C4+TMA-Adj.: Test that C3/C4 better than C3: P=0.281 |
| C3/C4+TMA Adj.+RAASi:Test that C3/C4 better than C3: P=0.317 |
